# Supplementary material for: Seasonal changes in the volume and intensity of children’s school year physical activity
Source: Research Square preprint supplement (doi:10.21203/rs.3.rs-7122314/v1), 2025-07-21
Supplement: Supplementary file 2 [file f129ca9583f263a405b96b3a.docx]

Table S1. Trajectory models for weekday physical activity volume and intensity.

|  | AvAcc | | IG | |
| --- | --- | --- | --- | --- |
|  | β | 95% CI | β | 95% CI |
| Autumn (intercept) | **43.92** | **42.34, 45.51** | **-2.12** | **-2.14, -2.10** |
| Winter | 0.49 | -1.42, 2.41 | 0.002 | -0.03, 0.03 |
| Summer | **4.44** | **2.47, 6.40** | 0.02 | -0.01, 0.05 |
| Sex (ref = girls) | **7.05** | **5.49, 8.61** | **0.09** | **0.06, 0.11** |
| FSM (ref = not eligible) | -1.25 | -3.38, 0.87 | -0.01 | -0.03, 0.02 |
| Ethnicity (ref = White) |  |  |  |  |
| Ethnicity: mixed | 2.51 | -1.67, 6.69 | 0.03 | -0.03, 0.10 |
| Ethnicity: Asian | -0.28 | -2.38, 1.82 | -0.01 | -0.04, 0.02 |
| Ethnicity: other | -8.35 | -20.16, 3.46 | 0.04 | -0.12, 0.20 |
| **BMIz** | **-0.73** | **-1.39, -0.07** | **-0.01** | **-0.02, -0.003** |

Notes. FSM = free school meals, BMIz = body mass index z-score,

AvAcc = average acceleration, IG = intensity gradient

Table S2. Interaction trajectory models for weekday physical activity volume and intensity.

|  | AvAcc | | IG | |
| --- | --- | --- | --- | --- |
|  | β | 95% CI | β | 95% CI |
| **Autumn (intercept)** | **43.13** | **41.23, 45.03** | **-2.14** | **-2.16, -2.11** |
| Winter | 1.14 | -1.57, 3.86 | 0.03 | -0.01, 0.07 |
| Summer | **6.24** | **3.49, 8.98** | **0.05** | **0.01, 0.09** |
| Sex (ref = girls) | **8.29** | **5.61, 10.97** | **0.12** | **0.08, 0.16** |
| FSM (ref = not eligible) | -1.27 | -3.39, 0.85 | -0.01 | -0.04, 0.03 |
| Ethnicity (ref = White) |  |  |  |  |
| Ethnicity: mixed | 2.63 | -1.54, 6.80 | 0.04 | -0.03, 0.10 |
| Ethnicity: Asian | -0.21 | -2.31, 1.89 | -0.01 | -0.04, 0.02 |
| Ethnicity: other | -8.11 | -19.91, 3.69 | 0.04 | -0.12, 0.20 |
| BMIz | -0.23 | -1.47, 1.01 | -0.01 | -0.03, 0.01 |
| Winter * Sex | -1.28 | -5.06, 2.50 | -0.05 | -0.11, 0.01 |
| Summer * Sex | -2.69 | -6.48, 1.10 | -0.05 | -0.11, 0.01 |
| Winter * BMIz | -0.19 | -1.87, 1.48 | -0.004 | -0.03, 0.02 |
| Summer * BMIz | -1.29 | -2.95, 0.37 | -0.01 | -0.04, 0.01 |

Notes. FSM = free school meals, BMIz = body mass index z-score,

AvAcc = average acceleration, IG = intensity gradient

Table S3. Trajectory models for weekend physical activity volume and intensity.

|  | AvAcc | | IG | |
| --- | --- | --- | --- | --- |
|  | β | 95% CI | β | 95% CI |
| **Autumn (intercept)** | **42.23** | **38.49, 45.98** | **-2.20** | **-2.23, -2.16** |
| Winter | 3.02 | -1.54, 7.58 | 0.03 | -0.01, 0.06 |
| Summer | 3.49 | -0.83, 7.82 | 0.02 | -0.02, 0.06 |
| **Sex (ref = girls)** | **3.89** | **0.29, 7.49** | **0.05** | **0.02, 0.09** |
| FSM (ref = not eligible) | 0.43 | -4.58, 5.44 | 0.00002 | -0.04, 0.05 |
| Ethnicity (ref = White) |  |  |  |  |
| Ethnicity: mixed | 2.31 | -6.46, 11.07 | 0.03 | -0.05, 0.11 |
| Ethnicity: Asian | -2.61 | -7.72, 2.51 | -0.03 | -0.08, 0.02 |
| Ethnicity: other | -8.36 | -36.21, 19.49 | -0.07 | -0.33, 0.18 |
| BMIz | -0.54 | -2.03, 0.96 | -0.01 | -0.02, 0.005 |

Notes. FSM = free school meals, BMIz = body mass index z-score,

AvAcc = average acceleration, IG = intensity gradient

Table S4. Interaction trajectory models for weekend physical activity volume and intensity.

|  | AvAcc | | IG | |
| --- | --- | --- | --- | --- |
|  | β | 95% CI | β | 95% CI |
| **Autumn (intercept)** | **42.10** | **37.73, 46.46** | **-2.20** | **-2.24, -2.16** |
| Winter | 2.64 | -3.34, 8.72 | 0.03 | -0.03, 0.08 |
| Summer | 4.21 | -1.67, 10.09 | 0.02 | -0.04, 0.07 |
| Sex (ref = girls) | 4.20 | -2.01, 10.41 | 0.05 | -0.004, 0.11 |
| FSM (ref = not eligible) | 0.41 | -4.61, 5.43 | -0.001 | -0.05, 0.05 |
| Ethnicity (ref = White) |  |  |  |  |
| Ethnicity: mixed | 2.35 | -6.42, 11.13 | 0.03 | -0.05, 0.11 |
| Ethnicity: Asian | -2.56 | -7.67, 2.55 | -0.03 | -0.08, 0.02 |
| Ethnicity: other | -8.35 | -36.29, 19.59 | -0.08 | -0.34, 0.18 |
| Winter * Sex | 0.19 | -8.18, 8.55 | -0.01 | -0.08, 0.07 |
| Summer * Sex | -1.11 | -9.86, 7.65 | 0.01 | -0.07, 0.09 |

Notes. FSM = free school meals, AvAcc = average acceleration, IG = intensity gradient

Table S5. Children’s descriptive characteristics and unadjusted Autumn physical activity outcomes by weekday data clusters (Mean (SD) unless otherwise stated)

| Weekday data | Most Active (n=77) | Somewhat Active (n=86) | Least Active (n=87) |
| --- | --- | --- | --- |
| Age (y) | 8.72 (0.38) | 8.69 (0.44) | 8.70 (0.43) |
| Sex |  |  |  |
| Boys (%) | 61.60 | 46.16 | 39.50 |
| Girls (%) | 38.40 | 53.72 | 60.50 |
| Height (cm) | 133.0 (5.80) | 132.00 (6.10) | 132.00 (5.75) |
| Weight (kg) | 31.10 (6.25) | 31.10 (7.09) | 31.60 (6.86) |
| BMI (kg⋅m2) | 17.60 (2.71) | 17.60 (3.10) | 17.90 (3.03) |
| BMIz | 0.41 (1.07) | 0.34 (1.12) | 0.32 (1.04) |
| Weight status |  |  |  |
| Normal weight (%) | 73.40 | 73.10 | 70.20 |
| Overweight/obese (%) | 26.60 | 26.90 | 29.80 |
| FSM eligibility (%) | 15.60 | 16.20 | 18.60 |
| EIMD rank | 14224.00 (10213.00) | 15133.00 (10060.00) | 14915.00 (10204.00) |
| Ethnicity |  |  |  |
| White/White British (%) | 78.30 | 78.10 | 76.70 |
| Mixed ethnicity (%) | 3.10 | 3.43 | 4.18 |
| Asian/Asian British (%) | 17.30 | 17.30 | 18.00 |
| Other ethnicity (%) | 1.29 | 1.15 | 1.15 |
| Physical activity outcomes |  |  |  |
| AvAcc (m*g*) | 53.00 (6.97) | 45.30 (6.96) | 43.90 (7.33) |
| IG | -2.01 (0.08) | -2.09 (0.07) | -2.14 (0.08) |

Notes. BMI = body mass index, FSM = free-school meals, EIMD = English Indices of Multiple Deprivation, AvAcc = average acceleration, m*g* = milligravitational unit, IG = intensity gradient

Table S6. Children’s descriptive characteristics and unadjusted Autumn physical activity outcomes by weekend data clusters (Mean (SD) unless otherwise stated)

| Weekend data | Most Active (n=78) | Active (n=84) | Least Active (n=87) |
| --- | --- | --- | --- |
| Age (y) | 8.71 (0.41) | 8.72 (0.41) | 8.68 (0.43) |
| Sex |  |  |  |
| Boys (%) | 49.40 | 48.70 | 47.80 |
| Girls (%) | 50.60 | 51.30 | 52.20 |
| Height (cm) | 132.00 (5.75) | 132.00 (5.82) | 132.00 (5.93) |
| Weight (kg) | 31.30 (6.74) | 31.30 (6.76) | 31.10 (6.91) |
| BMI (kg⋅m2) | 17.70 (2.98) | 17.70 (2.96) | 17.60 (3.04) |
| BMIz | 0.35 (1.08) | 0.35 (1.10) | 0.34 (1.10) |
| Weight status |  |  |  |
| Normal weight (%) | 72.20 | 71.70 | 72.50 |
| Overweight/obese (%) | 27.80 | 28.30 | 27.50 |
| FSM eligibility (%) | 16.80 | 16.80 | 17.00 |
| EIMD rank | 15011.0 (10190.00) | 14987.00 (9998.00) | 14592.00 (10208.00) |
| Ethnicity |  |  |  |
| White/White British (%) | 78.4 | 78.20 | 76.60 |
| Mixed ethnicity (%) | 3.62 | 3.31 | 3.83 |
| Asian/Asian British (%) | 16.70 | 17.30 | 18.40 |
| Other ethnicity (%) | 1.28 | 1.18 | 1.13 |
| Physical activity outcomes |  |  |  |
| AvAcc (m*g*) | 51.10 (8.78) | 49.70 (8.46) | 41.00 (8.50) |
| IG | -2.11 (0.07) | -2.12 (0.07) | -2.18 (0.07) |

Notes. BMI = body mass index, FSM = free-school meals, EIMD = English Indices of Multiple Deprivation, AvAcc = average acceleration, m*g* = milligravitational unit, IG = intensity gradient

Table S7. Cluster trajectory models for weekday physical activity volume and intensity.

|  | AvAcc | | IG | |
| --- | --- | --- | --- | --- |
|  | β | 95% CI | β | 95% CI |
| **Autumn: Most Active Cluster (intercept)** | **51.41** | **35.25, 67.57** | **-2.03** | **-2.23, -1.83** |
| Winter: Most Active cluster | -2.98 | -12.66, 6.70 | -0.05 | -0.20, 0.11 |
| Summer: Most active cluster | 1.64 | -6.60, 9.89 | -0.02 | -0.16, 0.12 |
| Autumn: Somewhat Active cluster | -7.26 | -29.02, 14.49 | -0.07 | -0.36, 0.22 |
| Winter: Somewhat Active cluster | 4.28 | -8.91, 17.47 | 0.05 | -0.16, 0.28 |
| Summer: Somewhat Active cluster | 3.52 | -7.87, 14.92 | 0.05 | -0.16, 0.27 |
| Autumn: Least Active cluster | -8.46 | -38.40, 21.48 | -0.12 | -0.50, 0.27 |
| Winter: Least Active cluster | 5.15 | -12.34, 22.65 | 0.08 | -0.19, 0.35 |
| Summer: Least Active cluster | 4.13 | -11.87, 20.12 | 0.07 | -0.20, 0.35 |
| **Sex (ref = girls)** | **2.97** | **0.76, 5.18** | **0.04** | **0.01, 0.07** |
| FSM (ref = not eligible) | -0.88 | -3.31, 1.54 | 0.001 | -0.03, 0.03 |
| Ethnicity (ref = White) |  |  |  |  |
| Ethnicity: mixed | 3.12 | -1.62, 7.87 | 0.04 | -0.03, 0.10 |
| Ethnicity: Asian | 0.16 | -2.39, 2.72 | -0.01 | -0.04, 0.02 |
| Ethnicity: other | -5.88 | -19.17, 7.42 | 0.08 | -0.09, 0.25 |
| **BMIz** | -0.58 | -1.29, 0.13 | **-0.01** | **-0.02, -0.001** |

Notes. FSM = free school meals, BMIz = body mass index z-score, AvAcc = average acceleration, IG = intensity gradient

Table S8. Gender interaction cluster trajectory models for weekday physical activity volume and intensity.

|  | AvAcc | | IG | |
| --- | --- | --- | --- | --- |
|  | β | 95% CI | β | 95% CI |
| **Autumn: Most Active Cluster (intercept)** | **51.45** | **34.97, 67.93** | **-2.03** | **-2.24, -1.83** |
| Winter: Most Active cluster | -2.98 | -12.66, 6.70 | -0.05 | -0.20, 0.11 |
| Summer: Most active cluster | 1.65 | -6.59, 9.89 | -0.02 | -0.16, 0.12 |
| Autumn: Somewhat Active cluster | -7.11 | -29.06, 14.84 | -0.07 | -0.37, 0.23 |
| Winter: Somewhat Active cluster | 4.28 | -8.91, 17.46 | 0.05 | -0.16, 0.28 |
| Summer: Somewhat Active cluster | 3.52 | -7.87, 14.91 | 0.05 | -0.16, 0.25 |
| Autumn: Least Active cluster | -8.55 | -39.30, 22.20 | -0.12 | -0.51, 0.27 |
| Winter: Least Active cluster | 5.15 | -12.34, 22.63 | 0.08 | -0.19, 0.35 |
| Summer: Least Active cluster | 4.12 | -11.86, 20.11 | 0.08 | -0.20, 0.34 |
| Sex (ref = girls) | 3.17 | -2.22, 8.56 | 0.04 | -0.02, 0.10 |
| FSM (ref = not eligible) | -0.84 | -3.24, 1.57 | 0.001 | -0.03, 0.03 |
| Ethnicity (ref = White) |  |  |  |  |
| Ethnicity: mixed | 3.12 | -1.63, 7.87 | 0.04 | -0.03, 0.10 |
| Ethnicity: Asian | 0.24 | -2.34, 2.81 | -0.01 | -0.04, 0.02 |
| Ethnicity: other | -5.46 | -18.71, 7.80 | 0.09 | -0.08, 0.25 |
| **BMIz** | -0.56 | -1.27, 0.15 | **-0.01** | **-0.02, -0.001** |
| Somewhat Active cluster * Sex | -0.32 | -8.37, 7.74 | -0.01 | -0.09, 0.08 |
| Least Active cluster * Sex | 0.47 | -7.33, 8.27 | 0.01 | -0.08, 0.10 |

Notes. FSM = free school meals, BMIz = body mass index z-score, AvAcc = average acceleration, IG = intensity gradient

Table S9. Cluster trajectory models for weekend physical activity volume and intensity.

|  | AvAcc | | IG | |
| --- | --- | --- | --- | --- |
|  | β | 95% CI | β | 95% CI |
| **Autumn: Most Active Cluster (intercept)** | **50.15** | **9.66, 90.64** | **-2.12** | **-2.47, -1.79** |
| Winter: Most Active cluster | -3.34 | -37.61, 30.93 | -0.03 | -0.33, 0.27 |
| Summer: Most active cluster | -3.86 | -41.82, 34.10 | -0.04 | -0.34, 0.26 |
| Autumn: Somewhat Active cluster | -1.29 | -76.24, 73.67 | -0.01 | -0.63, 0.61 |
| Winter: Somewhat Active cluster | 1.67 | -62.75, 66.09 | 0.01 | -0.55, 0.57 |
| Summer: Somewhat Active cluster | 1.44 | -68.52, 71.40 | 0.01 | -0.54, 0.56 |
| Autumn: Least Active cluster | -10.06 | -70.31, 50.19 | -0.07 | -0.59, 0.45 |
| Winter: Least Active cluster | 8.45 | -42.12, 59.01 | 0.06 | -0.39, 0.52 |
| Summer: Least Active cluster | 10.29 | -44.35, 64.94 | 0.07 | -0.38, 0.52 |
| **Sex (ref = girls)** | 2.60 | -0.61, 5.81 | **0.04** | **0.01, 0.07** |
| FSM (ref = not eligible) | 0.51 | -4.23, 5.25 | -0.01 | -0.05, 0.04 |
| Ethnicity (ref = White) |  |  |  |  |
| Ethnicity: mixed | 2.96 | -5.66, 11.58 | 0.03 | -0.05, 0.11 |
| Ethnicity: Asian | -1.84 | -6.61, 2.93 | -0.02 | -0.06, 0.03 |
| Ethnicity: other | -11.76 | -34.13, 10.62 | -0.09 | -0.29, 0.11 |
| BMIz | -0.68 | -2.07, 0.71 | -0.01 | -0.02, 0.004 |

Notes. FSM = free school meals, BMIz = body mass index z-score, AvAcc = average acceleration, IG = intensity gradient

Table S10. Gender interaction cluster trajectory models for weekend physical activity volume and intensity.

|  | AvAcc | | IG | |
| --- | --- | --- | --- | --- |
|  | β | 95% CI | β | 95% CI |
| **Autumn: Most Active Cluster (intercept)** | **50.14** | **8.90, 91.38** | **-2.12** | **-2.47, -1.78** |
| Winter: Most Active cluster | -3.34 | -37.61, 30.93 | -0.03 | -0.33, 0.27 |
| Summer: Most active cluster | -3.86 | -41.82, 34.09 | -0.04 | -0.34, 0.26 |
| Autumn: Somewhat Active cluster | -1.14 | -77.44, 75.15 | -0.01 | -0.63, 0.62 |
| Winter: Somewhat Active cluster | 1.67 | -62.75, 66.09 | 0.01 | -0.55, 0.57 |
| Summer: Somewhat Active cluster | 1.44 | -68.52, 71.40 | 0.01 | -0.54, 0.56 |
| Autumn: Least Active cluster | -9.97 | -71.40, 51.46 | -0.07 | -0.60, 0.46 |
| Winter: Least Active cluster | 8.45 | -42.11, 59.01 | 0.06 | -0.39, 0.52 |
| Summer: Least Active cluster | 10.30 | -44.35, 64.94 | 0.07 | -0.38, 0.52 |
| Sex (ref = girls) | 2.70 | -3.72, 9.11 | 0.04 | -0.02, 0.10 |
| FSM (ref = not eligible) | 0.50 | -4.28, 5.27 | -0.01 | -0.05, 0.04 |
| Ethnicity (ref = White) |  |  |  |  |
| Ethnicity: mixed | 3.03 | -5.63, 11.69 | 0.03 | -0.05, 0.11 |
| Ethnicity: Asian | -1.86 | -6.64, 2.92 | -0.02 | -0.06, 0.03 |
| Ethnicity: other | -11.90 | -34.46, 10.67 | -0.09 | -0.29, 0.11 |
| BMIz | -0.68 | -2.07, 0.72 | -0.01 | -0.02, 0.004 |
| Somewhat Active cluster * Sex | -0.28 | -9.42, 8.85 | -0.001 | -0.08, 0.07 |
| Least Active cluster * Sex | -0.21 | -8.66, 8.25 | -0.001 | -0.08, 0.08 |

Notes. FSM = free school meals, BMIz = body mass index z-score, AvAcc = average acceleration,

IG = intensity gradient


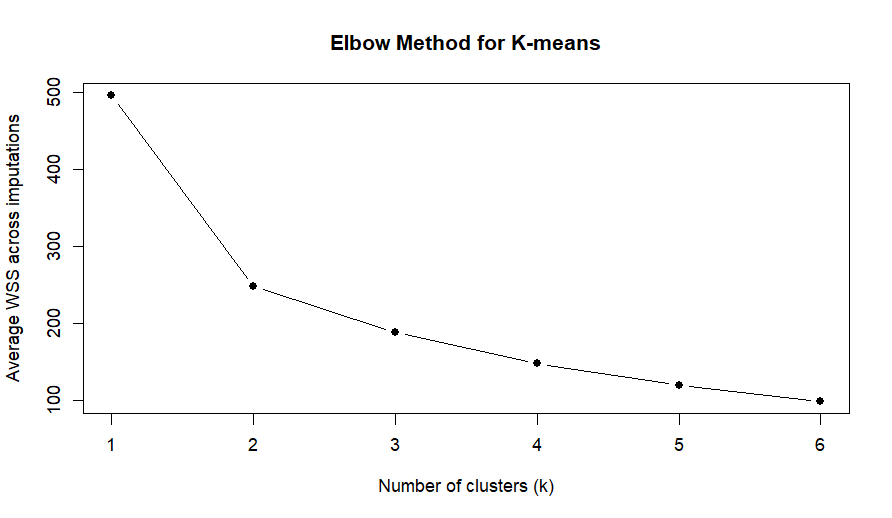


Figure S1. Elbow plot for k-means cluster analysis of weekday standardised AvAcc and IG. Note. WSS = within-cluster sum of squares.


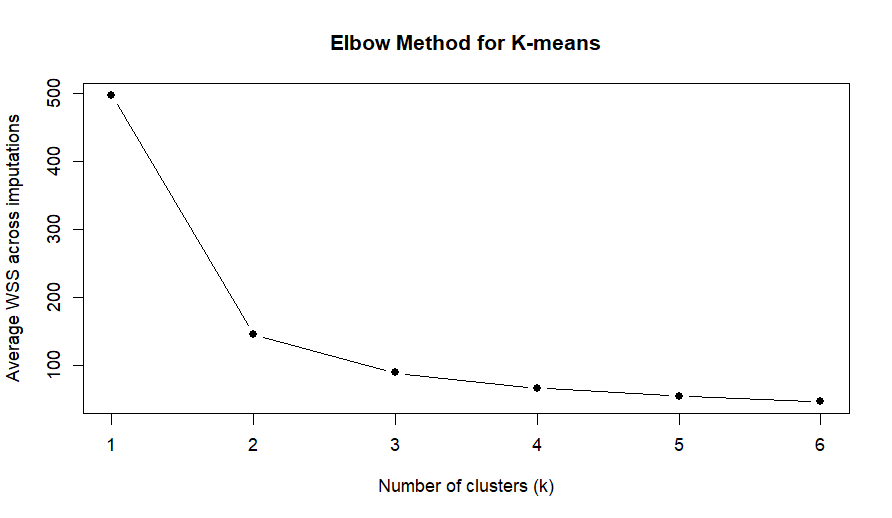


Figure S2. Elbow plot for k-means cluster analysis of weekend standardised AvAcc and IG. Note. WSS = within-cluster sum of squares.


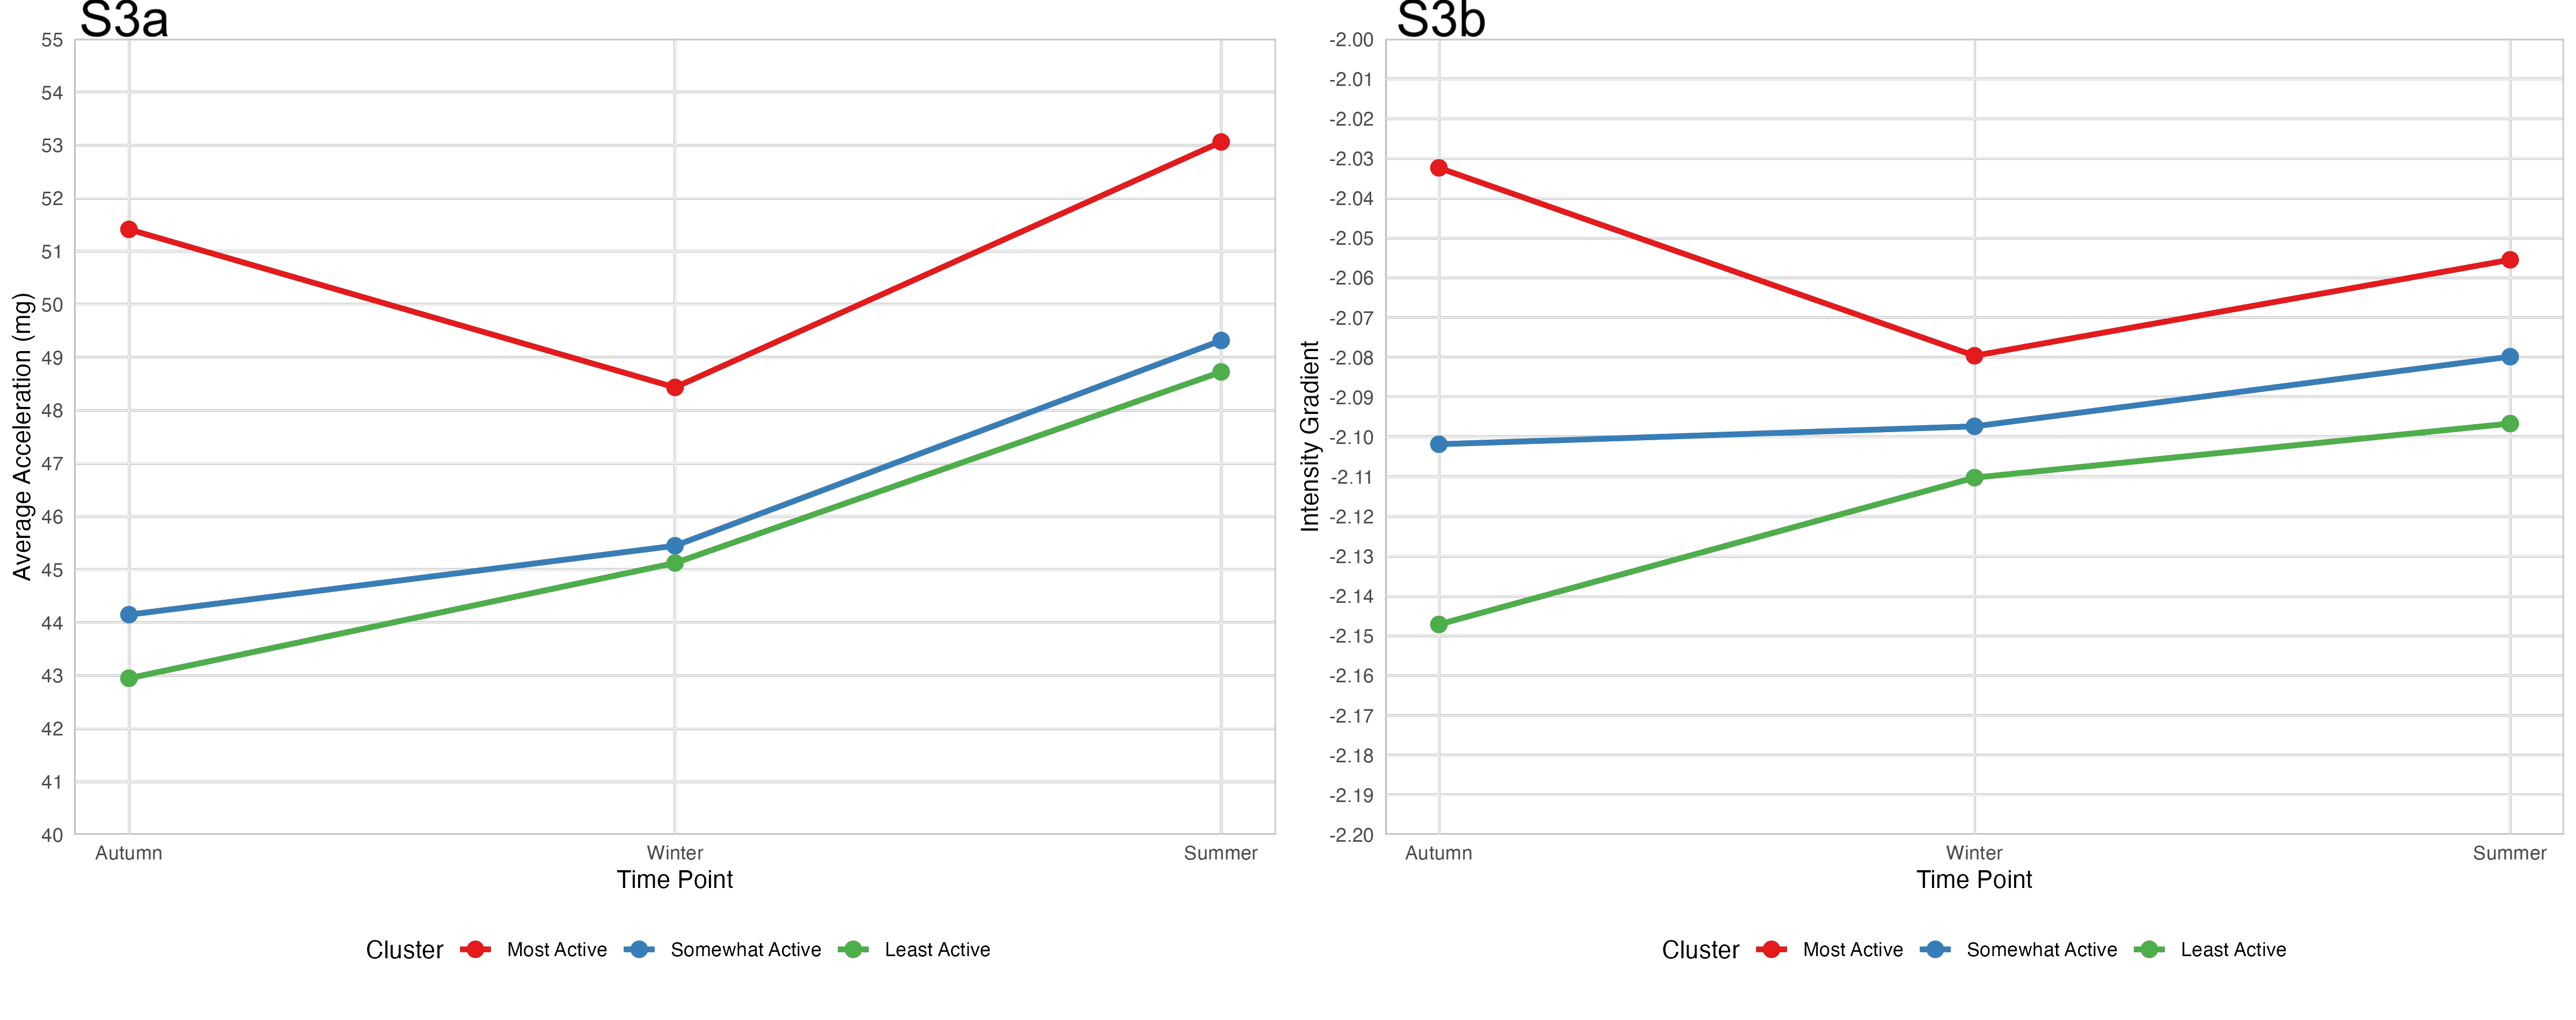


Figures S3a and S3b. Adjusted weekday average acceleration (Figure S3a) and intensity gradient (Figure S3b) trajectories of the three clusters over the school year. The plots are zoomed in with error ribbons removed and y-axis rescaled to aid more detailed interpretation.


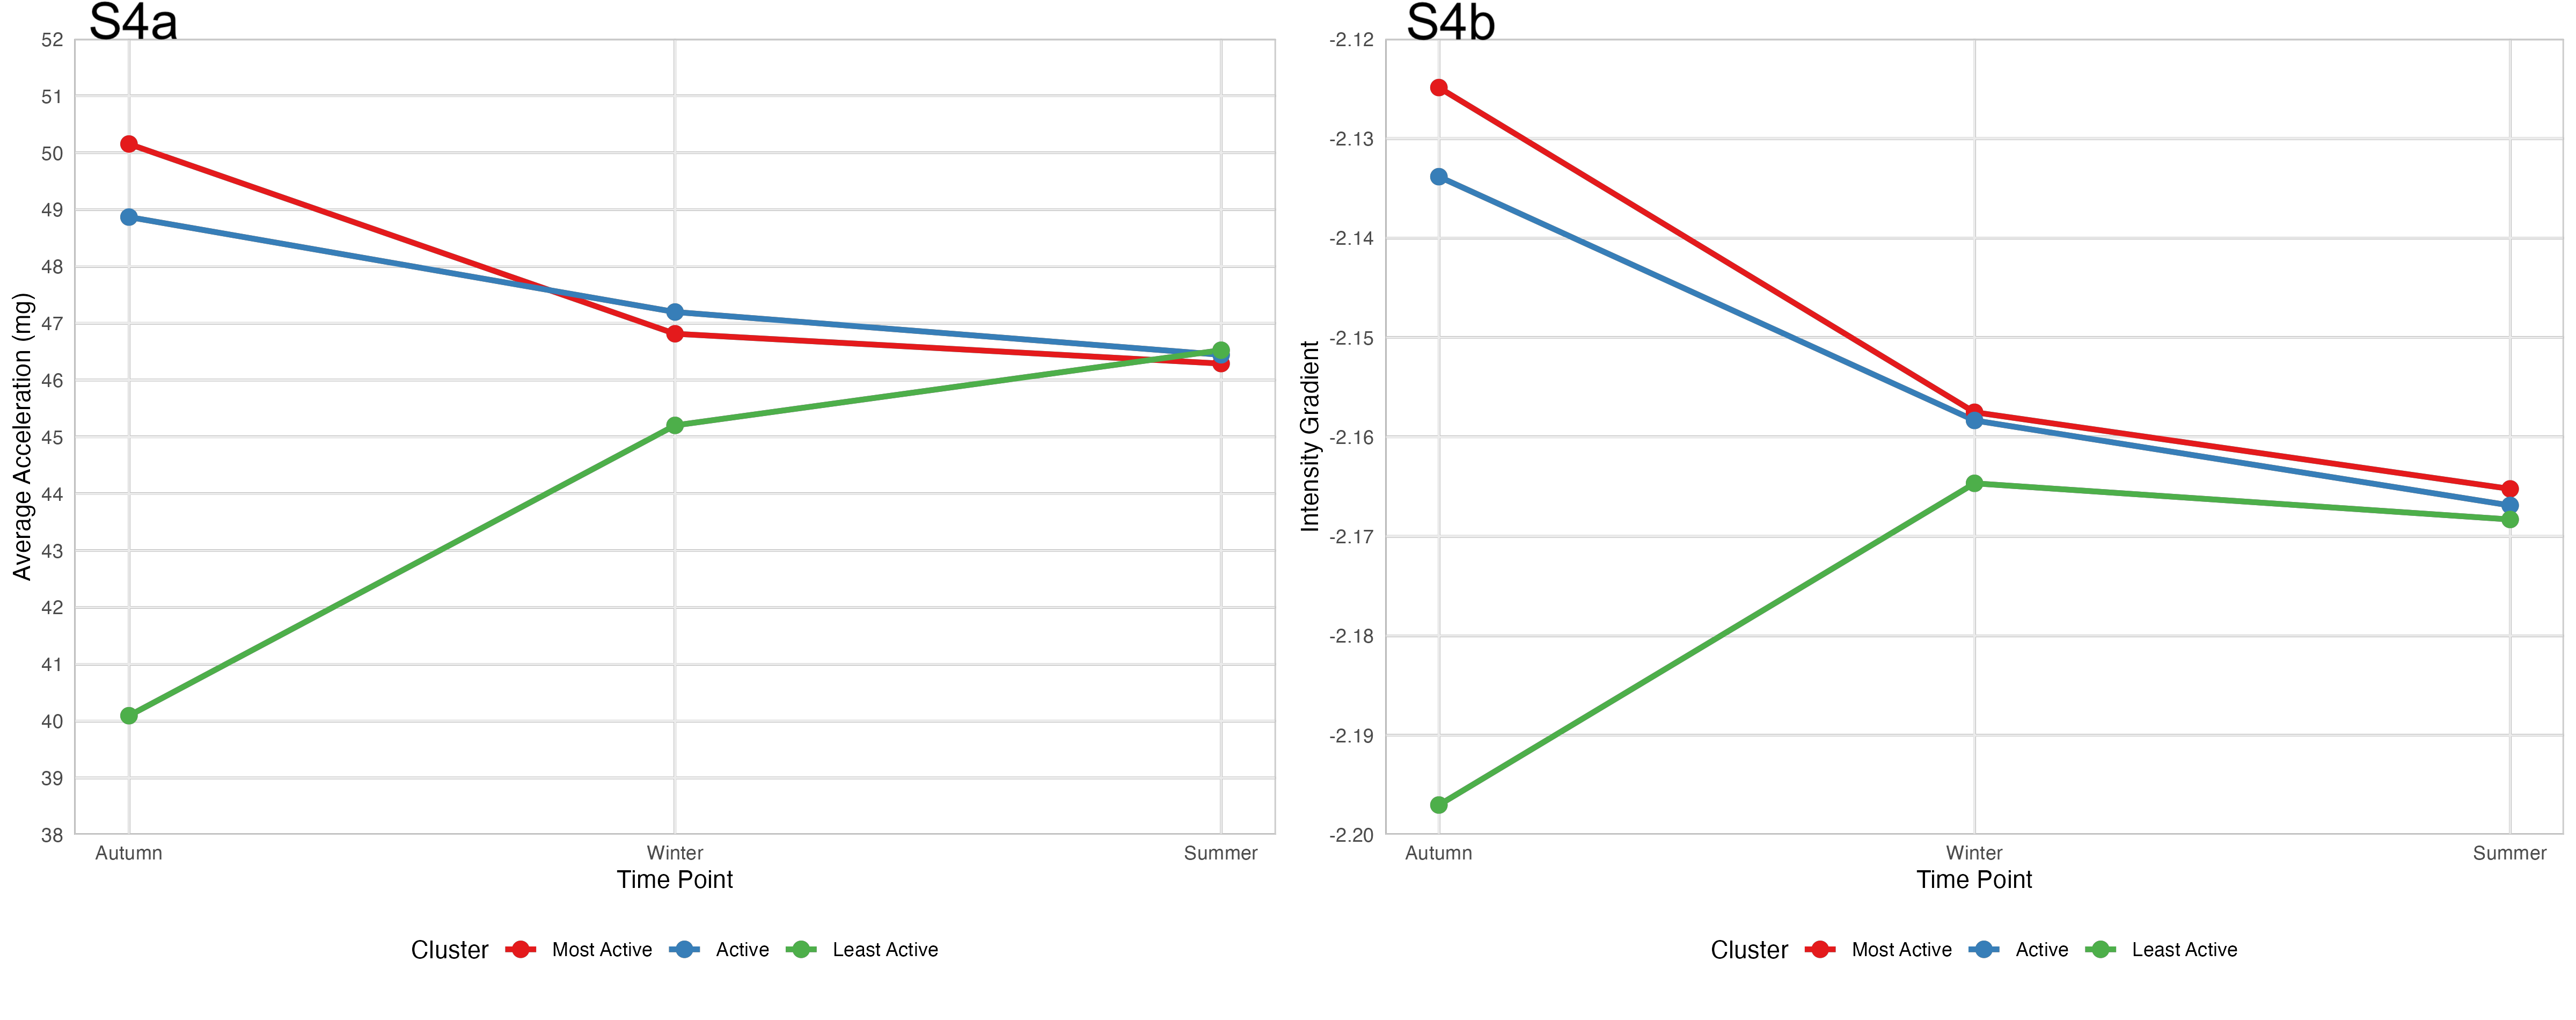


Figures S4a and S4b. Adjusted weekend average acceleration (Figure S4a) and intensity gradient (Figure S4b) trajectories of the three clusters over the school year. The plots are zoomed in with error ribbons removed and y-axis rescaled to aid more detailed interpretation.


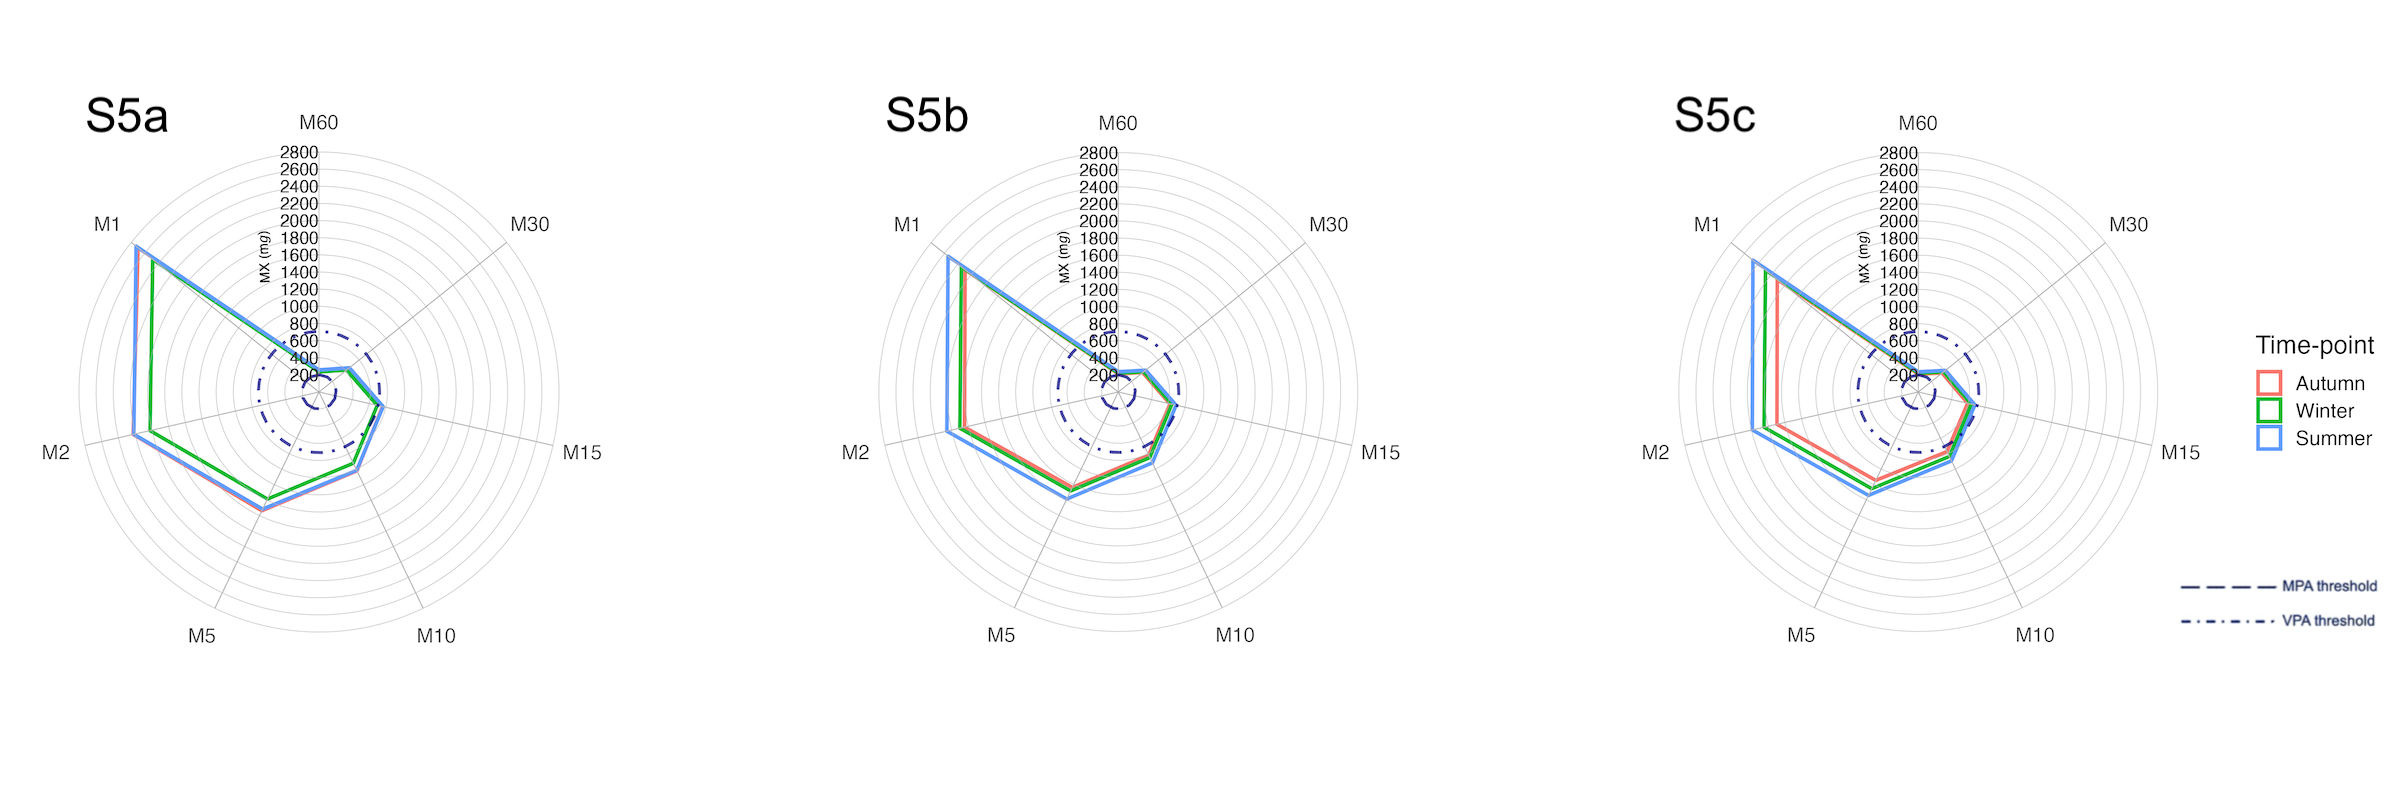


Figures S5a-c. MX metrics weekday school year physical activity profiles for the Most Active (a), Somewhat Active (b), and Least Active clusters (c). Each plot shows M60, M30, M15, M10, M5, M2, and M1.


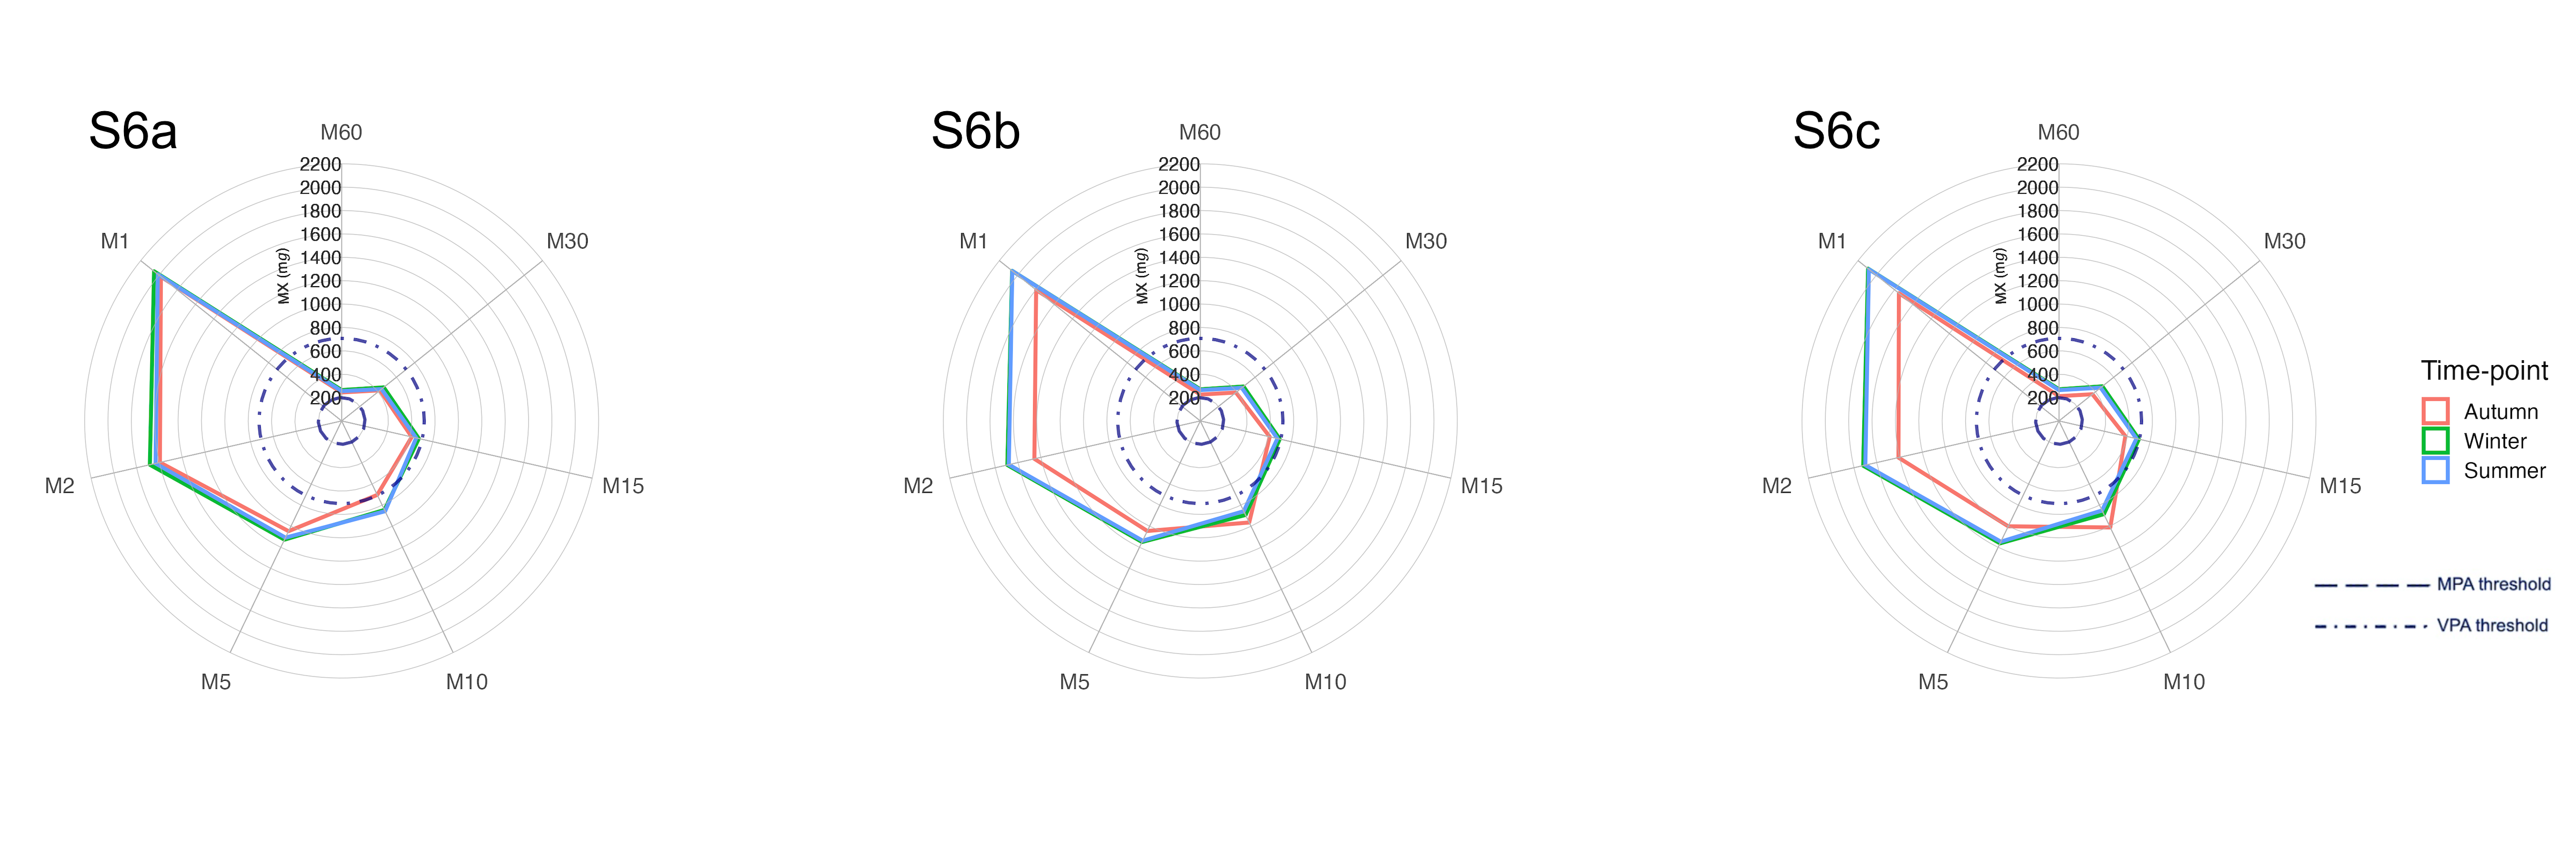


Figures S6a-c. MX metrics weekend school year physical activity profiles for the Most Active (a), Active (b), and Least Active clusters (c). Each plot shows M60, M30, M15, M10, M5, M2, and M1.
